# Supplementary figures and images for: Atomic insights into the oxygen incorporation in atomic layer deposited conductive nitrides and its mitigation by energetic ions
Source: Royal Society of Chemistry journal article supplement (doi:10.1039/d0nr08921d), 2021-01-01

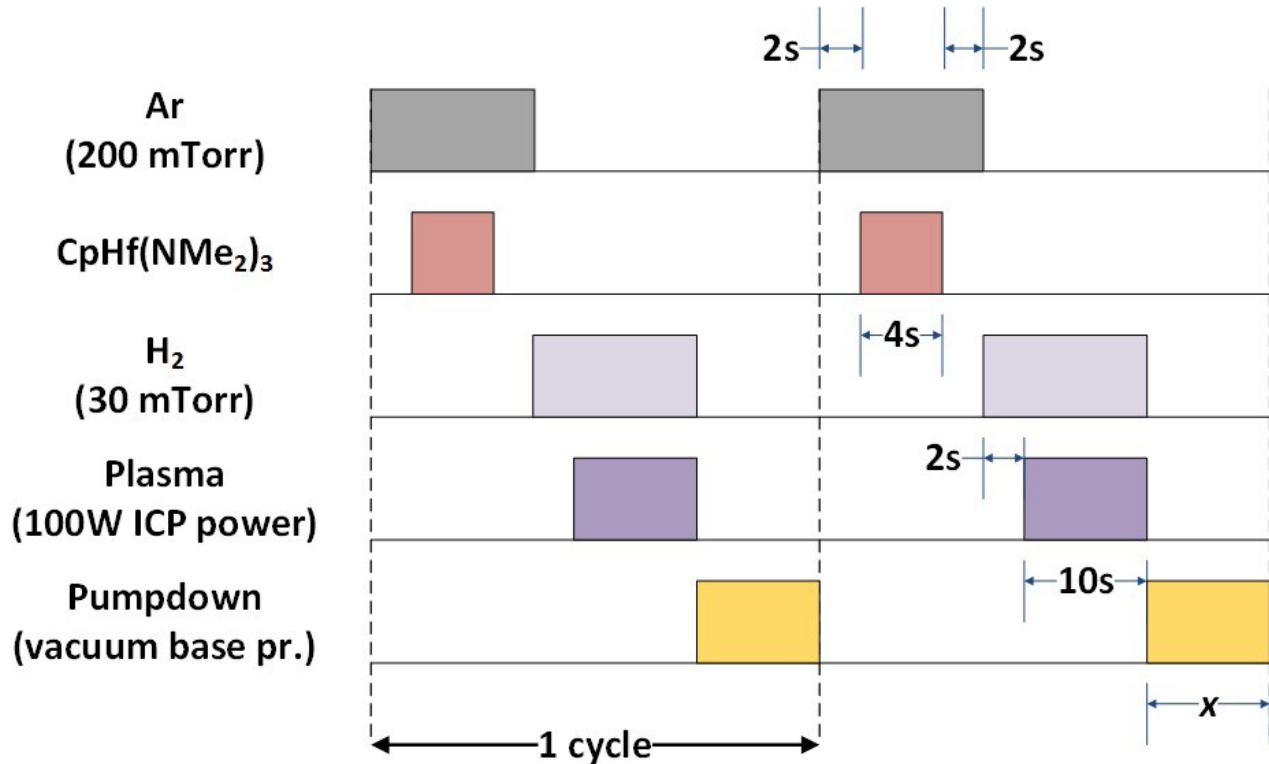

Supplement: d0nr08921d2.pdf [file d0nr08921d2.pdf]

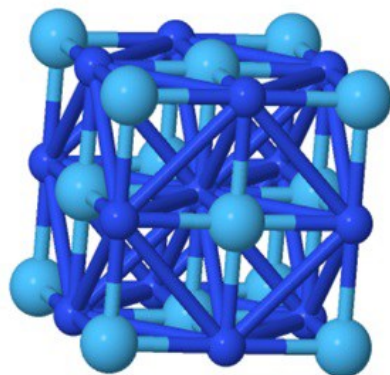

$\delta$ -Hf(III)N

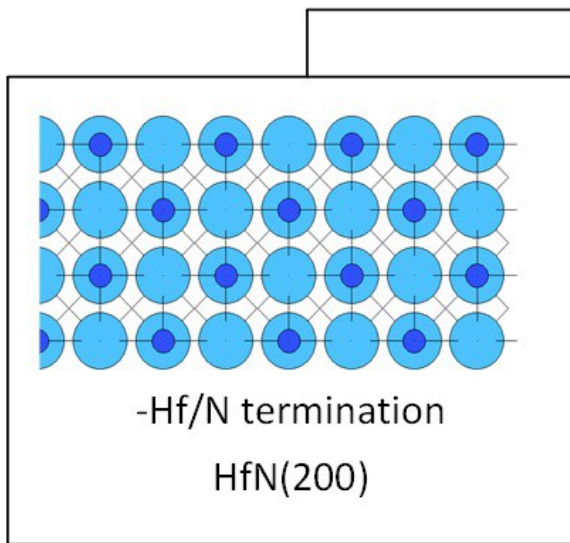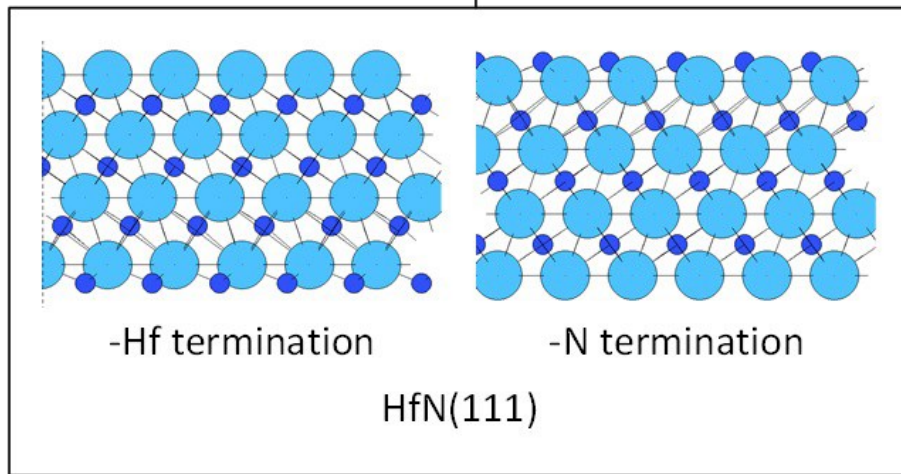

Supplement: d0nr08921d3.pdf [file d0nr08921d3.pdf]

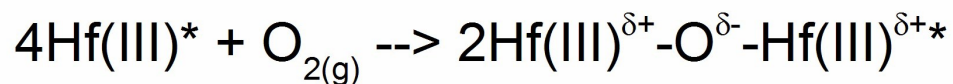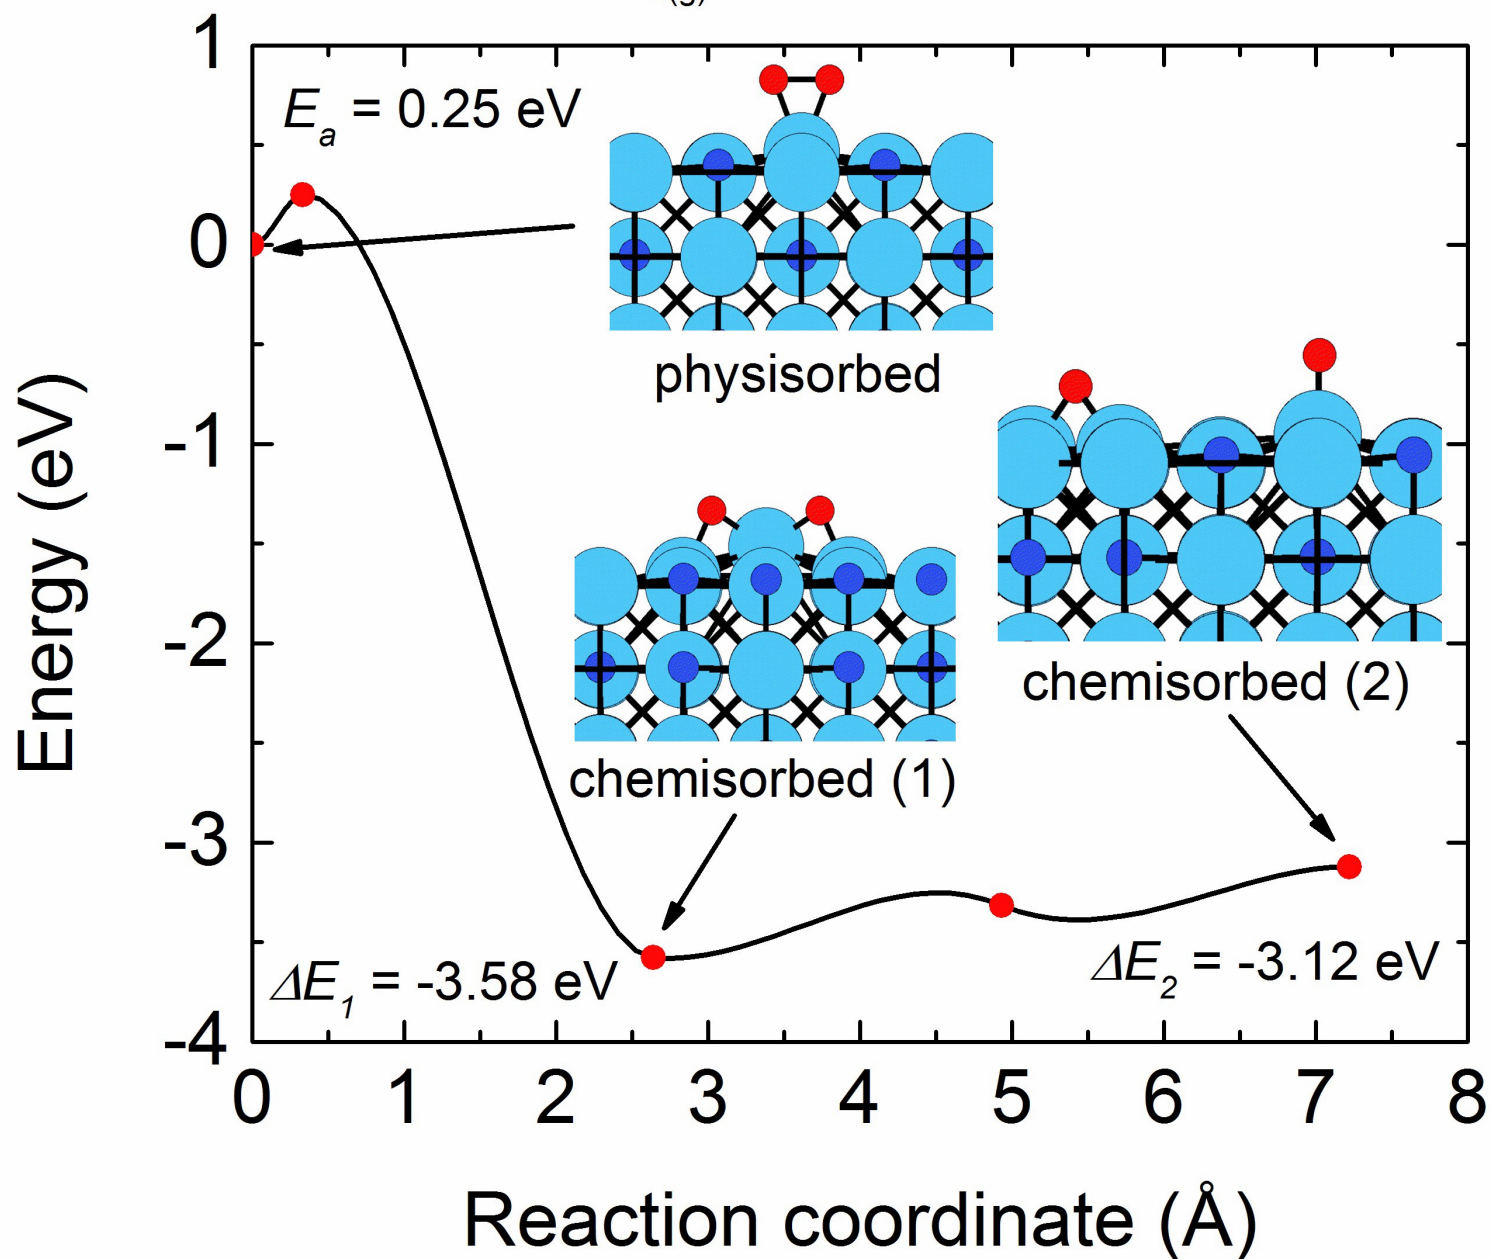

Supplement: d0nr08921d5.pdf [file d0nr08921d5.pdf]

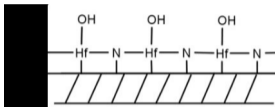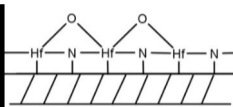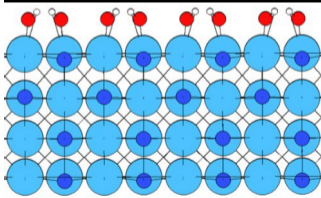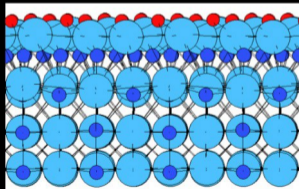

Hydroxylated HfN[200]

Oxygenated HfN[200]

Supplement: d0nr08921d6.pdf [file d0nr08921d6.pdf]

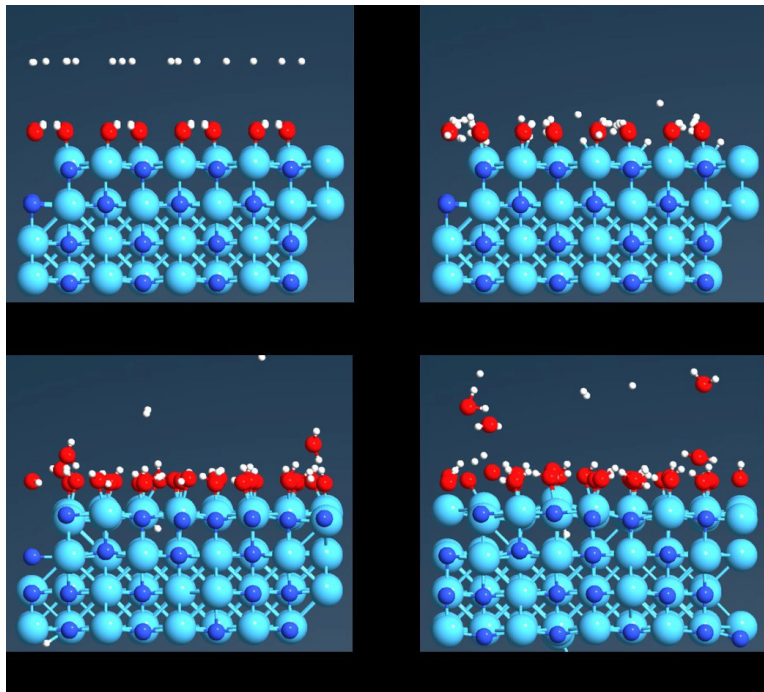

Supplement: d0nr08921d7.pdf [file d0nr08921d7.pdf]

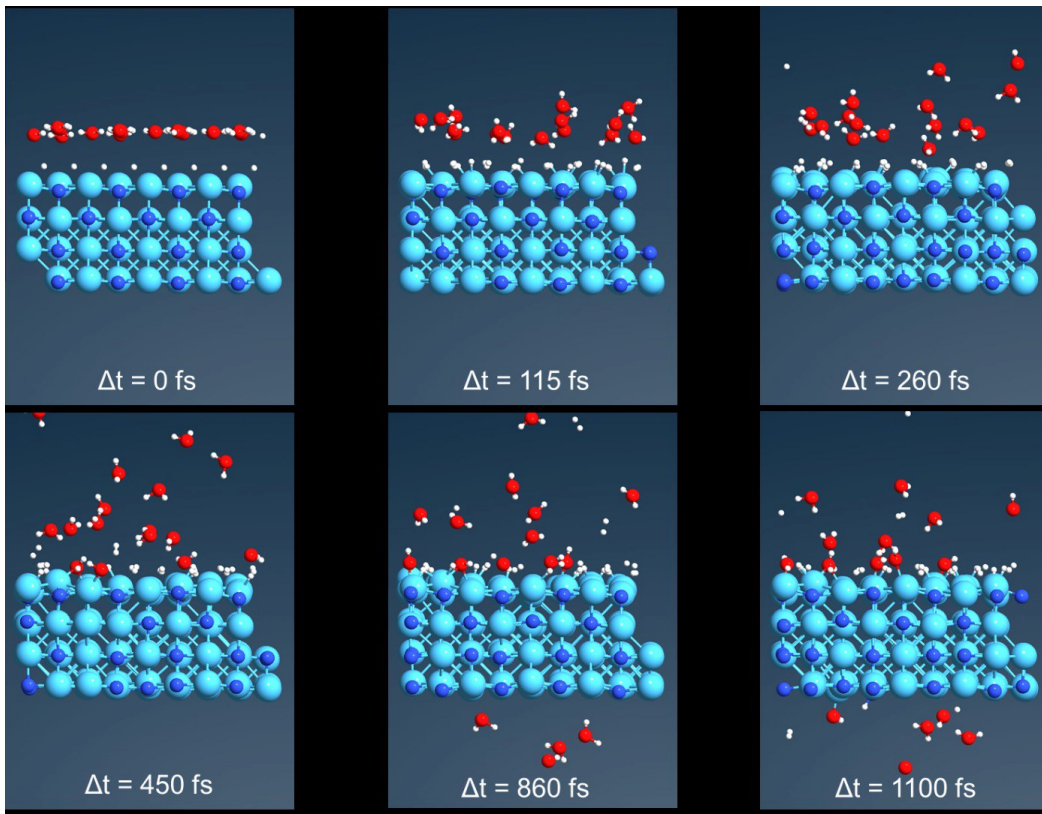

Supplement: d0nr08921d9.pdf [file d0nr08921d9.pdf]
